# Supplementary material
Source: publisher figshare collection journal article supplement (https://karger.figshare.com/ndownloader/files/7989478)
Supplement: Supplementary file 1 [file 7989478]

**Supplementary Information**

**Risk factors for severe reactions during double-blind placebo-controlled food challenges**

**Supplementary Table**

**Table S4.** Treatments for patients with positive challenge results

| Treatment | Mild (N = 79) | Moderate (N = 219) | Severe (N = 98) | All cases (N=393) |
| --- | --- | --- | --- | --- |
| Antihistamine (intravenous or oral) | 15 (19%) | 165 (76%) | 92 (94%) | 272 (69%) |
| β2 stimulant inhalation | 2 (3%) | 130 (60%) | 83 (85%) | 215 (55%) |
| Drip infusion | 1 (1%) | 76 (35%) | 91 (93%) | 168 (43%) |
| Steroid (intravenous or oral) | 0 (0%) | 70 (32%) | 74 (76%) | 144 (37%) |
| Adrenaline (intramuscular) | 0 (0%) | 0 (0%) | 90 (92%) | 90 (23%) |
| Adrenaline inhalation | 0 (0%) | 6 (3%) | 4 (4%) | 10 (3%) |
| No treatment | 63 (80%) | 26 (12%) | 0 (0%) | 89 (23%) |

Data are expressed as n (%).
